# Supplementary material for: Comparison of serum exosome isolation methods on co-precipitated free microRNAs
Source: PeerJ. 2020 Aug 28;8:e9434. doi: 10.7717/peerj.9434 (PMC7457927; doi:10.7717/peerj.9434)
Supplement: Supplemental Information 1 — The copies of cel-miR-39, miR-126 and miR-152 in Figures 2-4 and this shows the process of one-way and two-way ANOVA. [file peerj-08-9434-s001.xlsx]

## Sheet: Figure 2AB
Copies	cel-miR-39	10^9 copies/μL cel-miR-39 standard: 37700 and 38400 copies, and the ratio of sample/standard is x (line 2) /(37700+38400)/2	miR-126	miR-152	Notes: undetermined≈0 copies
Blank Control	undetermined		3070	1870
Control	736		2620	1740	cel-miR-39 groups use one-way ANOVA and miR-126, miR-152 groups use two-way ANOVA
RNase Inhibitor	203		1370	1550
Rnase(10)	139		545	936
Rnase(30)	193		416	951
Rnase(50)	127		317	745
Copies	cel-miR-39		miR-126	miR-152
Blank Control	undetermined		3210	1810
Control	981		2650	1710
RNase Inhibitor	217		1210	1530
Rnase(10)	97.3		521	1100
Rnase(30)	250		429	992
Rnase(50)	93.1		304	735
Copies	cel-miR-39		miR-126	miR-152
Blank Control	undetermined		1310	1680
Control	678		2700	2760
RNase Inhibitor	291		1380	2340
Rnase(10)	173		526	1330
Rnase(30)	121		549	1490
Rnase(50)	42.7		341	1030
Copies	cel-miR-39		miR-126	miR-152
Blank Control	undetermined		1390	1760
Control	742		2780	2680
RNase Inhibitor	122		1350	2070
Rnase(10)	186		489	1570
Rnase(30)	125		525	1540
Rnase(50)	81.6		344	982

## Sheet: Figure 2CD
Copies	cel-miR-39	10^7 copies/μL cel-miR-39 standard: 120 and 118 copies, and the ratio of sample/standard is x (line 2) /(120+118)/2	miR-126	miR-152	Notes: undetermined≈0 copies
Blank Control	undetermined		5110	5290
Control	2.43		5760	5830	cel-miR-39 groups use one-way ANOVA and miR-126, miR-152 groups use two-way ANOVA
RNase Inhibitor	undetermined		3340	5500
Rnase(10)	undetermined		1360	2870
Copies	cel-miR-39		miR-126	miR-152
Blank Control	undetermined		4430	5620
Control	1.1		5600	5630
RNase Inhibitor	undetermined		3450	5480
Rnase(10)	undetermined		1360	3030
Copies	cel-miR-39		miR-126	miR-152
Blank Control	undetermined		5760	6220
Control	undetermined		6100	5810
RNase Inhibitor	0.0863		5000	5370
Rnase(10)	undetermined		1420	3090
Copies	cel-miR-39		miR-126	miR-152
Blank Control	undetermined		5870	5610
Control	1.19		6030	5590
RNase Inhibitor	0.84		4610	5330
Rnase(10)	0.0863		1350	2903

## Sheet: Figure 3AB
Copies	cel-miR-39	10^9 copies/μL cel-miR-39 standard: 22800 and 22700 copies, and the ratio of sample/standard is x (line 2) /(22800+22700)/2	miR-126	miR-152	Notes: undetermined≈0 copies
Blank Control	undetermined		2330	2940
Control	5.35		2780	3550	cel-miR-39 groups use one-way ANOVA and miR-126, miR-152 groups use two-way ANOVA
RNase Inhibitor	2.91		1470	2460
Rnase(10)	1.49		653	2100
Copies	cel-miR-39		miR-126	miR-152
Blank Control	undetermined		2390	2950
Control	3.29		2630	3590
RNase Inhibitor	8.35		1530	2440
Rnase(10)	2.73		680	1900
Copies	cel-miR-39		miR-126	miR-152
Blank Control	undetermined		1720	2450
Control	9.98		2080	2490
RNase Inhibitor	1.81		1380	2770
Rnase(10)	2.86		883	2120
Copies	cel-miR-39		miR-126	miR-152
Blank Control	undetermined		1780	2430
Control	6.19		2020	2430
RNase Inhibitor	undetermined		1520	2630
Rnase(10)	undetermined		976	1840

## Sheet: Figure 4AB
Copies	cel-miR-39	10^9 copies/μL cel-miR-39 standard: 8680 and 8320 copies, and the ratio of sample/standard is x (line 2) /(8680+8320)/2	miR-126	miR-152	Notes: undetermined≈0 copies
Control	471		10200	5730
Incubation	45.4		7830	5700	cel-miR-39 groups use one-way ANOVA and miR-126, miR-152 groups use two-way ANOVA
Rnase(10)	71		6980	5060
Copies	cel-miR-39		miR-126	miR-152
Control	340		10200	5720
Incubation	110		7940	5570
Rnase(10)	undetermined		6940	4850
